# Supplementary material for: Enzalutamide induces cytotoxicity in desmoplastic small round cell tumor independent of the androgen receptor
Source: PubMed Central journal article supplement (PMC10995187; doi:10.1038/s42003-024-06003-0), 2024-04-04
Supplement: 42003_2024_6003_MOESM3_ESM.pdf [file 42003_2024_6003_MOESM3_ESM.pdf]

## **Description of Additional Supplementary Files**

**File name:** Supplementary Data 1

**Description:** Source data behind the graphs in the figures.
